# Supplementary material for: Stable dominance of parasitic dinoflagellates in Antarctic sponges
Source: PeerJ journal article supplement (doi:10.7717/peerj.18365), 2024-11-08
Supplement: Supplemental_Figure_5.pdf [file Supplemental_Figure_5.pdf]

MM022439\_Apicomplexa\_sp.

FN69810\_Gyrodinium\_dominans

HEE11580\_Gyrodinium\_moestrapali

FN698511\_Gyrodinium\_guillaui

AB120004\_Gyrodinium\_helvecum

AB120003\_Gyrodinium\_rubrum

AB120001\_Gyrodinium\_spirale

5 leaves Karolodinium veneficum

EF058239\_Gymnodinium\_impatiens

HM066998\_Brachidinium\_capitatum

HM067002\_Karenia\_bicuneiformis

HM067005\_Karenia\_capitata

HM067007\_Karenia\_sailiformis

EF492505\_Karenia\_mikimotoi

3 leaves Karenia brevis

AF274249\_Adenoides\_eludens

HO845329\_Pentaparsodinium\_tyrrenicum

AF022201\_Pentaparsodinium\_tyrrenicum

FX262492\_Pentaparsodinium\_dalei

AF274270\_Pentaparsodinium\_sp.

KAB1825\_Azadinium\_concinnum

IQ247707\_Azadinium\_caudatum

IQ247701\_Azadinium\_caudatum

KR382899\_Azadinium\_dexteroportum

KF543360\_Azadinium\_dalense

KJ481819\_Azadinium\_cuneatum

DQ504315\_Uncultured\_syndiniales

LC054933\_Heterocapsa\_psammophila

AF274266\_Heterocapsa\_pygmaea

AB183670\_Heterocapsa\_tiquetra

AF274267\_Heterocapsa\_rotundata

Q388464\_Heterocapsa\_rotundata

AF022196\_Gymnodinium\_aureolum

AF022194\_Gymnodinium\_fuscum

AB265962\_Gymnodinium\_catenatum

AF022197\_Gymnodinium\_impudicum

LC054930\_Gymnodinium\_dorsalisulcum

AB255833\_Protoperidinium\_claudicans

6 leaves Amphidinium carterae

AB1716911\_Protoperidinium\_americanum

3 leaves Islandinium tricirgatum

4 leaves Islandinium minutum

4 leaves Scrippsiella acuminata

KJ508017\_Dinophysis\_acuminata

AF239261\_Dinophysis\_norvegica

AB073119\_Dinophysis\_norvegica

EU780644\_Dinophysis\_caudata

EU780697\_Dinophysis\_acuta

AF072116\_Dinophysis\_fortii

AB386002\_Dinophysis\_infundibulum

DQ388460\_Protocentrum\_cassubicum

4 leaves Adenoides eludens

4 leaves Protocentrum sp.

AB284159\_Protoperidinium\_bipes

AB181883\_Protoperidinium\_concum

AB181881\_Protoperidinium\_abei

AJ353385\_Alexandrium\_taylori

AJ353378\_Alexandrium\_tenuatum

AJ353375\_Alexandrium\_effine

AB088282\_Alexandrium\_effine

LC036590\_Gonyaulax\_ellegaardiae

AF274258\_Gonyaulax\_cochlea

AF052190\_Gonyaulax\_spinifera

AF022155\_Gonyaulax\_spinifera

AJ333631\_Gonyaulax\_polygramma

AY775287\_Gonyaulax\_polygramma

3 leaves Akashiwo sanguinea

5 leaves Potamella gracilis

HO822131\_Symbiodinium\_kawaguti

EF036539\_Symbiodinium\_goreau

L13717\_Symbiodinium\_coccolobum

L13718\_Symbiodinium\_mandrianae

AF225965\_Symbiodinium\_californium

EF492496\_Symbiodinium\_microdratrium

7 leaves Uncultured\_syndiniales

FJ440625\_Ichthyodinium\_chabelardi

AB276368\_Ichthyodinium\_sp.

JF791082\_Uncultured\_Duboscoquella

JF791022\_Uncultured\_Duboscoquella

JF791023\_Uncultured\_Duboscoquella

JF791021\_Uncultured\_syndiniales

JF791081\_Uncultured\_Duboscoquella

AB295041\_Duboscoquella\_sp.

MG209086\_Euduboscoquella\_sp.

AB295040\_Duboscoquella\_sp.

15 leaves Uncultured\_syndiniales

ASV093

EU793385\_Uncultured\_syndiniales

ASV023

EU793340\_Uncultured\_syndiniales

EU793380\_Uncultured\_syndiniales

EU793901\_Uncultured\_syndiniales

EU793918\_Uncultured\_syndiniales

EU793917\_Uncultured\_syndiniales

EU793830\_Uncultured\_syndiniales

EU793361\_Uncultured\_syndiniales

ASV0091

EU793269\_Uncultured\_syndiniales

EU793687\_Uncultured\_syndiniales

ASV134

ASV312

ASV180

EU793384\_Uncultured\_syndiniales

ASV212

EU793695\_Uncultured\_syndiniales

EU793713\_Uncultured\_syndiniales

ASV005

ASV016

ASV113

ASV159

ASV230

LN869921\_Thalassomyces\_sp.

FJ593706\_Eilobopsis\_chattioni

FJ593708\_Eilobopsis\_chattioni

DQ504327\_Uncultured\_syndiniales

DQ604356\_Uncultured\_syndiniales

KV853757\_Hematodinium\_sp.

Q925237\_Uncultured\_Hematodinium

EF065717\_Hematodinium\_perezii

EF065718\_Hematodinium\_perezii

EU793415\_Uncultured\_syndiniales

JF791036\_Uncultured\_Ameobophya

JF791037\_Uncultured\_Ameobophya

JF791070\_Uncultured\_Ameobophya

EU793867\_Uncultured\_syndiniales

EU793715\_Uncultured\_syndiniales

EU793688\_Uncultured\_syndiniales

EU793692\_Uncultured\_syndiniales

JF791084\_Uncultured\_syndiniales

EU793772\_Uncultured\_syndiniales

EU793785\_Uncultured\_syndiniales

AY775284\_Ameobophya\_sp.

AY775285\_Ameobophya\_sp.

AF239260\_Ameobophya\_sp.

EU793706\_Uncultured\_syndiniales

EU793833\_Uncultured\_syndiniales

JF790998\_Uncultured\_Ameobophya

17 leaves Uncultured\_syndiniales

18 leaves Uncultured\_syndiniales
